# Supplementary material for: Response Time to Flood Events using a Social Vulnerability Index (ReTSVI)
Source: Copernicus journal article supplement (doi:10.5194/nhess-2017-395), 2017-11-21
Supplement: Supplementary file [file nhess-2017-395-RC2-supplement.pdf]

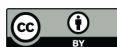

## Response Time to Flood Events using a Social Vulnerability Index (ReTSVI)

Alvaro Quezada-Hofflinger<sup>1</sup>, Marcelo A. Somos-Valenzuela<sup>2,3</sup>, Arturo Vallejos-Romero<sup>1</sup>

<sup>1</sup>Nucleo de Ciencias Sociales, Universidad de la Frontera, Temuco, 4780000, Chile

<sup>2</sup>Agricultural and Forestry Sciences, Universidad de La Frontera, Temuco 4780000, Chile

<sup>3</sup>Northeast Climate Science Center, University of Massachusetts, Amherst, 01003, USA

*Correspondence to:* Marcelo A. Somos-Valenzuela (marcelo.somos@ufrontera.cl)

**Abstract.** Current methods used to estimate people's evacuation times during a natural disaster assume that human responses across different social groups are similar. However, individuals respond differently based on their socioeconomic and demographic characteristics and previous knowledge. This article develops the Response Time by Social Vulnerability Index (ReTSVI), which is a methodology to estimate how human response time to evacuation warnings during a natural hazard is affected by considering characteristics related to both physical and social vulnerability. ReTSVI is a three-step methodology: first we calculate a population's evacuation curves considering social vulnerability level, certain demographic information and a model that describes an inundation hazard. Then, we use a mobilization model to generate evacuation maps per level of vulnerability and we also estimate the social vulnerability index for the area of study. In the third step, we combine the results from the second step to generate a map that indicates the percentage of people that could evacuate a hazard zone according to their social vulnerability level. Finally, we provide an example of the application of ReTSVI in a potential case of a severe flood event in Huaraz, Peru. The results show that during the first 5 minutes of the evacuation, the population that lives in neighborhoods with high social vulnerability evacuate 15% and 22% fewer people than the neighborhoods with medium and low social vulnerability. These differences gradually decrease over time after the evacuation warning and social vulnerability becomes less relevant after 30 minutes. Using a methodology such as ReTSVI allows first responders to identify areas where the same level of physical vulnerability affects distinct groups differently, providing them with a tool to quantify the differences in time to evacuate and where the resources before and during an evacuation should be preferentially allocated.

**Keywords:** ReTSVI, Social Vulnerability, Early Warning Systems, Flood Hazard Evacuation

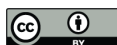

## 1 Introduction

The costs associated with health, food security and the physical environment produced by climate change are expected to reach between 2 and 4 trillion US dollars by 2030 (Hallegatte, 2014). The United Nations has indicated that the frequency and severity of climate change-related natural disasters are expected to increase faster than risk reduction can be achieved (UN, 2009). For example, natural disasters caused around 3.5 trillion US dollars in damages from 1980 to 2011, one-third took place in low or middle-income countries, and the number of people affected by natural disasters increased 1.5 times, economic damage by 1.8 times and total deaths by two times (Basher, 2006; Hallegatte, 2014).

A key strategy to reduce the loss of human life during a disaster is to improve preparedness. A common means to achieve this is to develop Early Warning Systems (EWS) to alert the population to evacuate before disaster strikes. Ideally, EWS should consider not only the so called physical dimensions such as exposure and intensity, but also the human or social dimensions that help us to understand differences in response to similar stresses (Basher, 2006; Bouwer, 2011; Nagarajan et al., 2012; Nicholls and Klein, 1999). Individual characteristics such as age, race, age, education, income, and employment influence the susceptibility to which certain groups or communities might be exposed and also define their ability to respond to a natural hazard (Cutter et al., 2003; Gaillard and Dibben, 2008). For example, women and men or those people with different levels of physical and cognitive ability, experience and respond to disasters differently (Cutter and Finch, 2008; Oksu et al., 2005; ISDR, 2004; Santos and Aguirre, 2004). Despite the evidence, the literature focuses mainly on the physical dimension of natural hazards and disregards human aspects. A real improvement in our understanding of emergency evacuations will depend on the integration of both (Basher, 2006; Couling, 2014; Santos and Aguirre, 2004).

The problem that arises is how we can incorporate social and physical vulnerability in a comprehensive manner to improve our understanding of an evacuation process. Concepts have been developed independently in the social sciences and engineering; therefore, it is not a straightforward process to link them. In fact, there is little data on how social vulnerability influences the evacuation process and how it is linked to the number of human casualties (Bolin, 2007; Morss et al., 2011). Address this problem, some scholars have mapped physical and social vulnerability to visualize how they overlap. They have also combined them using arithmetic operations such as multiplication or addition of social and physical vulnerability indexes to create a unique indicator that considers both vulnerabilities (Cutter & Emrich, 2006; Hegglin & Huggel, 2008). This information is still descriptive and provides qualitative information to policy makers, government institutions or local governments to understand how a population would react in an evacuation process. Therefore, questions such as: what it means to live in a neighbourhood with high physical and social vulnerability? and, how much time will the population need to evacuate neighbourhoods with high social vulnerability and low physical vulnerability? are not possible to answer with the current methods developed in social sciences nor engineering.



### 1.1 Social Vulnerability and Natural Disasters

The need to adapt to climate change is widely recognized, and, there is a critical need to understand how people or communities will adapt to global environmental change. It is clear that the consequences associated with natural disasters cannot be understood without information about the community that will be affected (Adger, 1999; UN, 2009; Urwin and Jordan, 2008).

Recent major natural disasters such as Hurricane Katrina and the 2010 earthquake in Haiti have shown the relevance of integrating social vulnerability into risk management and decision-making (Flanagan et al., 2011). This integration refers to identifying which and where problems exist before natural disaster strikes, making it possible to take steps to prevent possible damage (Schmidtlein et al., 2008). In this context, a better understanding of how problems like segregation, socioeconomic deprivation and inequalities affect the type of response and the degree of resiliency of communities affected by natural disasters is crucial. With this information, federal and local governments could be more effective in mitigating losses or improving the recovery of communities (Cutter and Emrich, 2006; Heinz Center, 2002). The degree to which communities and people are vulnerable to hazards is explained not only by proximity to potential natural disasters, but also social characteristics such as socioeconomic and demographic features that could exacerbate or lessen the impact of a disaster (Chakraborty et al., 2005; Cutter et al., 2000).

The study of vulnerability can be traced back to the early 1950s and 1960s in the field of behavioural sciences, the main objective of which was to understand the features of areas that make them either suitable to inhabit. During the 1970s, the US federal government was interested in the relationship between social well-being and progress indicators; consequently, the connection between socioeconomic inequalities and social problems became clearer at that time (Cutter & Emrich, 2006). Today, the concept has broadened to include a more comprehensive approach that combines different areas, such as social, demographic, economic, and geographic vulnerability, but each discipline defines the concept differently (Alwang et al., 2001; Balica, 2012; Birkmann, 2007). For example, in the economic literature, vulnerability includes food security and sustainable development (Fekete, 2011; Rygel et al., 2006). In the disaster risk community, vulnerability is defined as the physical, social, and environmental factors that increase the likelihood of a community being impacted by hazards (Zhou et al., 2014).

Research in social vulnerability linked to natural hazards can be divided into two groups. The first group, “post-disaster cases studies,” tries to understand how natural disasters impact differently communities based on their level of social vulnerability (Cutter et al., 2015). Most of the research in this area uses qualitative methods, such as semi structured interviews, focus groups, key informant interviews and participant observation (Dzialek et al., 2016). One of the main limitations of these studies is that their findings cannot be generalized to aggregated levels such as regions or countries. The second group of research is in “geospatial modelling studies.” Scholars in this subfield use primarily quantitative methods and focus on creating maps or developing indexes to compare the different levels of social vulnerability among communities, regions or countries (Rufat et al., 2015). A central aim of developing techniques to quantify vulnerability is to reduce gaps



between theoretical concepts of vulnerability and the decision-making process (Birkmann, 2007). There are multiple challenges in constructing an index to measure the social vulnerability of a certain population. The most evident is the degree of subjectivity in the selection of variables as well as the application and operationalization of vulnerability as a concept

 Fekete, 2011). Furthermore, an index does not indicate the structure and causes of social vulnerability; therefore, using a single factor to measure vulnerability might disregard the importance of particular variables that are relevant to explaining social vulnerability in a particular area (Rygel et al., 2006).

Despite these limitations, scholars have developed indices to quantify social vulnerability based on their interests. Some researchers use the percentage of women, racial groups or age average as indexes to estimate different levels of social vulnerability (Harvey et al., 2016; Jonkman et al., 2009; Sadia et al., 2016). Other scholars use variables linked with social vulnerability as independent variables in regression models (Dzialek et al., 2016); variables are simply ranked from lowest to highest values (Flanagan et al., 2011) or using the weighted average to estimate social vulnerability (Adger and Vincent, 2005). However, these indexes have some limitations. Namely, they use a limited number of variables and do not consider the interrelationship among variables to quantify social vulnerability. To address this problem, researchers have employed strategies such as including a higher number of variables to construct social vulnerability indexes or estimating the connection among variables that are linked theoretically with social vulnerability. In this area, one of the most recognized indices applied both in the US and abroad is the Social Vulnerability Index (SoVI) (Cutter, 1996). SoVI has been used in California, Colorado and South Carolina in the USA, and in countries such as England, Australia, Germany, and Norway (Zhu et al., 2014). The SoVI approach has been replicated in different geographical settings, and on different spatial and temporal scales (Schmidtlein et al., 2008). The use of SoVI is relevant because the method makes it possible to compare the spatial variability in socioeconomic vulnerability using a single index value. SoVI can also be linked spatially to physical aspects to calculate the overall vulnerability of a specific place (Boruff et al., 2005).

Social vulnerability indexes are useful to detect differences in social vulnerability to flood events (Fekete, 2009). In particular, the Social Vulnerability Index (SoVI) (Cutter, 1996) is adaptable to developing countries since it can be constructed using Census data from the area of study.

 The literature identifies several variables that contribute to social vulnerability. At the individual level, social vulnerability is related to poverty and health indices, age and education level. At the community level, social vulnerability is affected by income distribution, access to economic assets, and qualitative indicators of institutional arrangements (Adger, 1999). Furthermore, Fekete (2010) identified key variables that may explain the different levels of social vulnerability such as age group, gender, income, education, whether one owns a home, social capital, and household size. Cutter, Boruff, & Shirley (2003) also included race and ethnicity, commercial and industrial development, unemployment, rural/urban residency, residential property, infrastructure and lifelines, occupation, family structure, population growth, medical services, social dependence and special needs populations as fundamental variables to quantify social vulnerability.



## 1.2 Response Time, Evacuation and Flood Impacts

- Multiple factors seem to affect people's decision-making process to evacuate, such as risk perception, beliefs, geographic characteristics, previous knowledge, social networks, gender, age and class, among others (Elliott and Pais, 2006; Lindell et al., 2005; Mileti and O'Brien, 1992; Whitehead et al., 2000). Understanding what factors influence people's decisions in an evacuation is relevant because this information could help to improve the evacuation process, for example, reducing the time of evacuation response, and consequently decreasing the percentage of human casualties.
- The most sensitive cost of disaster is the loss of life; nonetheless, a limited number of methods estimate the loss of life due to natural disasters and just a few of them consider social vulnerability as an explanatory variable in their models (Jonkman et al., 2008).
- 10 

For ocean and river floods, variables such as the percentage of buildings collapsed, the proportion of evacuated people seem to influence the number of human fatalities (Vrouwenvelder and Steenhuis, 1997). Other scholars take into account the level of water depth, flow velocity, the possibilities for evacuation, flood hazard and area vulnerability (Boyd, Levitan, & van Heerden, 2005; Jonkman, 2001). In the case of dam break floods, Brown & Graham (1988) analysed 24 major dam failures and flash floods to estimate the number of lives lost as a function of time available for evacuation and the number of people
  - 15 

at risk, they found that time available for evacuation and population size, similar results were found by DeKay & McClelland (1993). Graham (1999) proposed that fatality rates are functions of the severity of the flood, the amount of warning time and the population's understanding of the hazard. In another example, to estimate human casualties due to flood events, the US Army Corps of Engineers developed HEC-FIA. Models, in general, assume that people react the same way during an evacuation process, and do not consider that people can respond differently based on their social vulnerability.
  - 20 

Few authors consider the characteristics of the population to estimate human casualties during a flood event. Reiter (2001) incorporated some variables linked to social vulnerability such as the number of children and elderly to estimate the loss of life during a flood event. Penning-Rowsell and colleagues (2005) consider "people vulnerability" defined by age, disability or illness using census data. A general conclusion from the literature explored is that only a few of the methods studied have systematically included social vulnerability as an explanatory variable of human fatalities during natural disasters. In fact,
  - 25 

Jonkman et al. (2008) reviewed 20 methods to quantify the loss of life during different types of flood events and only found that Ramsbottom and colleagues (2004) include levels of population vulnerability, and this category is based on expert judgment. Consequently, even though there is an upward trend of research that endeavours to understand how social characteristics of population influence human response to natural disasters, academics have failed to incorporate social vulnerability into estimations of loss of life (Elliott and Pais, 2006; Rodriguez et al., 2007). We argue that this is due to the
  - 30 

lack of understanding of how social vulnerability influences the evacuation process and human casualties (Bolin, 2007; Morss et al., 2011). In fact, current methods to quantify social vulnerability allow for the classification of neighbourhoods, counties or regions from the lowest to highest levels of vulnerability. However, using these classifications scholars or policy makers cannot predict how many people from neighbourhoods with low vulnerability will evacuate versus those who live in



neighbourhoods with high vulnerability or how much time people who live in neighbourhoods with medium vulnerability take to evacuate versus those who live in highly vulnerable areas, etc. To fill this gap in the literature, we propose the Response Time by Social Vulnerability Index (ReTSVI), a methodology that incorporates the demographic and socioeconomic characteristics of population into the current evacuation models.

## 5 2.Methods and data to estimate ReTSVI

### 2.1 Conceptual model of ReTSVI

The Response Time by Social Vulnerability Index (ReTSVI) methodology allows for the inclusion of social vulnerability into the traditional evacuation/mobilization models. Figure 1 is a chart of ReTSVI, we use three types of input data, which are: 1) the evacuation curves, one for each level of vulnerability (high, medium and low vulnerability); 2) a model that describes the physical hazard that the population may be exposed to, for example, the time that a flood takes to reach a populated area; and 3) demographic information such as a census data that allows us to categorize the population into different levels of social vulnerability. Then we have two intermediate models. The first one corresponds to the mobilization model that combines the evacuation curves and the inundation model. The result of this step are three maps (one for each level of vulnerability) of the percentage of people that evacuate before the flood strikes a place. The second intermediate model is the calculation of the social vulnerability index (SVI) using the census data, which produces a map of the city in which we can classify each block by social vulnerability. Finally, we combined the results (Integration Model Figure 1) from the mobilization model and the SVI calculations to generate a map with the percentage of people that can evacuate, which considers their social vulnerability level.

Insert Figure 1

### 2.2 Application of ReTSVI in a potential flood in Huaraz, Peru.

In 1941, the city of Huaraz was affected by a Glacier Lake Outburst Flood (GLOF) generated at Lake Palcacocha, in the Cordillera Blanca, Peru (Figure 2). The GLOF killed in the order of 2000 people and damaged infrastructure all the way from the lake, located in the Cordillera Blanca, to the Pacific Ocean (Carey, 2010; Carey, 2005; Wegner, 2014). According to new observations and data, a new GLOF could occur at this location. In fact, Lake Palcacocha has been declared in a state of emergency several times, and currently, there are initiatives to mitigate the risk by lowering the water level and installing early warning systems (EWS) to protect the population in case a GLOF occurs (HiMAP, 2014). The physical aspects of a potential GLOF have been studied extensively with the support of international agencies such as USAID, the IDB, and the government of Peru (Rivas et al. , 2015; Somos-Valenzuela, 2014; Somos-Valenzuela et al., 2016). However, the social aspects of a flood hazard have not been studied except for qualitative studies (Hegglin & Huggel, 2008; Somos-Valenzuela, 2014).



Insert Figure 2

### 2.2.1 Input Data

To produce the ReTSVI we use three types of input data (Figure 1). First, we need the **evacuation curves**, one for each level of social vulnerability. Ideally, the evacuation curves that we used are generated in the area of study, however, there is no data that describes how people in Huaraz evacuate after an EWS is released; therefore, we had to generate this information. Our closest available event was the tsunami triggered by an 8.3 magnitude earthquake on 16 September 2015 in Coquimbo, Chile. Second, a model describing a potential hazard is also needed, thus we use the model of a potential GLOF in Huaraz developed by Somos-Valenzuela et al. (2016). This model provides the time that people have to react before the inundation arrives. Finally, we have the 2007 Census data provided by the Ministry of Environment of Peru to create a social vulnerability map of Huaraz.

#### **Surveys in Coquimbo, Chile**

We conducted 22 surveys with first responders to the 8.3 magnitude earthquake and tsunami that occurred on September 16, 2015, in Coquimbo, Chile. Four institutions that work directly to help the population during the evacuation process participated in this study: the navy, the police, firefighters and the municipality of Coquimbo. Each institution selected at least five employees to respond to our questionnaire, these employees work directly during the emergency to help people evacuate their houses. The survey was completed with the help of a research assistant that conducted a personal interview with each participant.

We asked first responders to estimate the average evacuation time and the percentage of the population that evacuates their households from **0 to 15 minutes, 0 to 30 minutes, 0 to 45 minutes, 0 to 60 minutes** in neighbourhoods with **medium and high** social vulnerability in Coquimbo.

#### **Census Data from Peru**

We used the 2007 national population census to quantify the social vulnerability of Huaraz, Peru. The census has 53 questions that describe the main socio demographic characteristics of the population of Peru (INE, 2015). The census data is aggregated at the block level, and in the case of Huaraz provides full information on 1,404 blocks. The census data is divided into three main categories: (a) location of household (blocks), (b) household characteristics: number of rooms, ownership, type of house, etc. and (c) population characteristics by block: age, religion, marital status, education, occupation, etc. There are **24** variables available in these three categories. Blocks without population are excluded from the analysis.

#### **Flood Model**

In this study, we will use the inundation results obtained by Somos-Valenzuela et al. (2016) that considers that an avalanche of rocks and ice could potentially fall into Palcacocha Lake and produce a chain of events that would lead to flooding in Huaraz. From all the scenarios analysed, in this study, we will use the scenario in which an avalanche of 3 million cubic



meters falls into Palcacocha Lake producing a wave that overtops the moraine dike and inundates Huaraz. In Figure 3 (0 m Lowering), we show the physical hazard map for that scenario with no mitigation.

Insert Figure 3

### 2.2.2 Evacuation Model

5 To estimate the percentage of people that evacuate we use the **LIFESim model as a base framework**. The Army Corps of Engineering incorporated this model into the HEC-Fia model (Lehman and Needham, 2012; USACE, 2012) **to evaluate how flood events affect the evacuation during flood events**. LIFESim has three modules: 1) Warning and Evacuation, 2) Loss of Shelter, including prediction of building performance, and 3) Loss of Life calculation.

To estimate the number of people that can perish during a flood event we need to divide the calculation into two main  
 10 processes. First, we need to estimate the number of people at risk ( $N_{par}$ ) that are not able to escape before a flood arrives, or what it is known as the number of people exposed to risk ( $N_{exp}$ ). Second, we need to calculate the percentage from  $N_{exp}$  that **can survive once they are in the inundation zone. This paper deals with the first process, the calculation of  $N_{exp}$  by including social vulnerability.**

Explaining why people evacuate faster, slower, or not at all is a process with many layers that is not easy to quantify. In the  
 15 literature it is possible to recognize marked processes that can be generalized in Equation 1. First, we need to know the fraction of people that can escape (FE), for which we need to know how much time people have to escape (TE) and how feasible it is that in TE people can reach a safe area. For example, in a sudden dam breach, the maximum TE is the time that a flood has to travel from the dam to the area of interest (Graham, 2009; Jonkman et al., 2008; McClelland and Bowles, 2002). Then we have the fraction of people that can find shelter (FS) within the inundated area and finally the number of  
 20 people that can be rescued (NRES)

$$N_{EXP} = (1 - FE) \cdot (1 - FS) \cdot (NPAR) - NRES \quad (1)$$

Since we are interested in the impact of social vulnerability in the evacuation process, we reduce Equation 1 to Equation 2

$$N_{EXP} = (1 - FE) \cdot (NPAR) \quad (2)$$

The model LIFESim provides a methodology for how to calculate FE (Aboelata and Bowles, 2005). We use LIFESim to  
 25 illustrate how to apply our findings, but the **accuracy of the methodology is beyond the scope of this paper** and needs further analysis. To calculate the proportion of people that escape we consider three processes: warning, mobilization, and evacuation-transportation.

#### Warning

Time is a key component of the evacuation process; therefore, an efficient EWS is crucial to saving lives. However,  
 30 understanding that there is an imminent threat is not a direct process. Equation 3 from Rogers and Sorensen (1991) is used to estimate the proportion of people that understand the alarm when they hear it or learn from others' behavior that there is an imminent hazard and they need to evacuate.



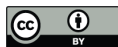

$$\frac{dn}{dt} = k \cdot (a_1 \cdot a_{1f} \cdot (N - n)) + (1 - k) \cdot (a_2 n \cdot (N - n)) \quad (3)$$

Where:

$\frac{dn}{dt}$  = is the proportion of people that understand that there is imminent hazard.

- 5  $k$  = percentage of people alert as a function of the broadcast system ((Rogers and Sorensen, 1991))  
 $(1-k)$  = proportion of people left to be warned ((Rogers and Sorensen, 1991))  
 $a_1$  = effectiveness of the warning system (Table 1 from (Rogers and Sorensen, 1991))  
 $a_{1f}$  = adjustment factor by location and activity (Table 2 from (Rogers and Sorensen, 1991))  
 $a_2$  = effectiveness of the contagion warning process (Table 1 from (Rogers and Sorensen, 1991))
- 10  $N$  = fraction that the system is designed to warn in the first 30 minutes after issuance of the warning, also referred to in Table 1 from (Rogers and Sorensen, 1991), as the 30-min limit, and  $n$  = proportion of people warned.

#### Mobilization Process

For people understand that there is a threat, they start to evacuate to a safe zone. Figure 35 from Aboelata & Bowles (2005) defines mobilization curves, below we show the “improved” curves from the cited reference.

- 15 **HecFia**, which applies a version of LIFESim, includes the activities in which people are involved at the moment of a flood. To understand the impacts of engaging in daily activities on the evacuation, we combined the warning penetration (using sirens and tone alert radios) and the mobilization process, including the uncertainty bounds for both processes, with a Monte Carlo simulation with 1000 samples shows that the activity, as it is described in LIFESim, that people are doing when the alarm is released does not affect the penetration of the warning.
- 20 Although the emphasis of this work is to include Social Vulnerability, it is pertinent to show a current methodology that is adapted by the U.S. Army Corps of Engineers to provide context on how our data fits into state of the art evacuation process assessments. In Figure 4 we demonstrated that according to the LifeSIM/HecFIA models the activity that people are doing when the alarm is released does not cause significant changes in the percentage of people mobilized. Therefore, we will not include activities in our calculations when we include Social Vulnerability. Additionally, at the moment of the survey, we
- 25 did not specify to the first responder to quantify the time that people take to understand the alarm (warning penetration) nor the time that it took them to get ready to evacuate (mobilization). Therefore, the answers from the first responders correspond to the penetration and mobilization processes aggregated, which is equivalent to Figure 4.

Insert Figure 4

#### Escape

- 30 In the example of the application of this methodology, we assumed that people would walk at a speed that ranges from 80-187 meter per minute with an average of 107 meters per minute (Aboelata and Bowles 2005). The shortest path was calculated using ArcGIS.



### 2.2.3 Social Vulnerability Index

One of the main critics of the use of indexes to quantify social vulnerability is the limited number of variables and the lack of connection and interrelationship among variables used by the indexes. To face these limitations, we construct a Social Vulnerability Index (SVI) by analysing census data using Principal Component Analysis (PCA) following the methodology developed by Cutter et al., (2003). The main objective of a PCA is to extract information from the variables and represent this information as a set of new orthogonal variables called principal components. (Wold et al., 1987). The use of this technique allows for robust and consistent numbers of variables that can be analysed to estimate changes in social vulnerability over time (Cutter et al., 2003). We followed Schmidtlein et al. (2008), who list seven steps to calculate the Social Vulnerability Index (SVI).

## 3 Results

### 3.1 Survey to first responders

The survey responses plotted in Figure 5 indicate that the population of high social vulnerability takes on average 22 minutes to evacuate after an alarm is activated, while neighbourhoods with medium and low vulnerability take 19 and 16 minutes on average. Figure 5 illustrates that areas of high social vulnerability systematically evacuate fewer people than areas with medium or low social vulnerability. The first five minutes are key regarding differences among the three groups. For example, the answers from the first responders indicate that blocks with high social vulnerability evacuate 15% and 22% fewer people than the blocks with medium and low social vulnerability. These differences gradually decrease over time; for example, between 0-30 minutes, groups with high social vulnerability evacuate 5% and 10% fewer people than groups with medium and low social vulnerability, and between 0-60 minutes the differences are 3% and 6% between these three groups.

Insert Figure 5

### 3.2 Case Study: Hypothetical Application Case of ReTSVI in Huaraz, Peru.

#### 3.2.1 Social Vulnerability Index

Peru has a long history of mudflows generated from glacial lakes in the Cordillera Blanca. As global warming progresses and glaciers start shrinking at a higher rate, this problem is growing. In some cases, glaciers leave behind a weak moraine that holds a large amount of water that can suddenly release and generate floods (for more details see Carey, 2010; Hegglin & Huggel, 2008; Somos-Valenzuela et al., 2016).

Using the population census of Peru and PCA, we were able to identify 20 census variables grouped into six components that explained social vulnerability among all the neighbourhoods in Huaraz (Table 1). The first component explains 20% of the variance and identifies the wealth of each block measured by population with primary and college education, with health insurance, indigenous population, white collar jobs and households with five or more rooms. The groups most affected by



natural disasters—the elderly, women, and people with disabilities—are grouped in the second component, which explains 9% of the variance. The third component describes variables linked with poverty such as illiteracy rates, the existence of informal settlements, and households without electricity. 8% of the variation in blocks is captured by this component. The fourth component identifies home-ownership and marital status; this factor explains 7% of the variance. The fifth component groups neighbourhoods with high population density and workers in blue collar jobs that are usually linked with low-income payment, insecure and more precarious work conditions. This component captures 7% of the variation in blocks. Finally, the sixth component identifies children (<1 years old) and population working in the manufacturing sector; this component explains 6% of the variance

Insert Table 1

10

Figure 6 illustrates, most of the blocks located close to the Quilcay River exhibit a higher level of social vulnerability. Conversely, those blocks concentrated in the south of the city (away from the Quilcay River) are less vulnerable. Finally, the population who lives upriver, north of Huaraz, present a middle level of vulnerability with a combination of medium-low and low levels of social vulnerability.

15

Insert Figure 6

### 3.2.2 Evacuation process

We calculated the percentage of people that could evacuate after a GLOF from Palcacocha Lake, Peru. An ideal EWS would release an alarm as soon as the hazard is detected. However, the protocols normally require checking multiple sensors in order to avoid a false positive error. This process delays the alarm's release consuming important time that could otherwise be used for the population to begin evacuating. We use two methodologies to estimate the proportion of inhabitants that can leave their household before the hazard strikes. First, we use the empirical equations described in the methodology, where we assumed that different groups react and evacuate homogeneously (Figure 7). Second, we use the information provided by the first responders, census data and SVI to include social vulnerability in the evacuation process (Figure 8). In both cases, we estimate the percentage of people that evacuate if the alarm is sounded at 0, 20, 40, 60, 70, 80, 90 and 100 minutes after the inundation starts traveling from Palcacocha Lake toward Huaraz.

An obvious, but not less important finding is that as the alarm is delayed the population has less time to escape. The results also suggest that social vulnerability has a larger impact when the warning alarm is delayed. After 60 minutes, Figure 8 gets patchier, which indicates that the population has different rates of evacuation, even though they have a similar amount of time to respond. Also, when we use information from the first responders, the evacuation is faster than when we use empirical equations from LIFESim. The explanation for this may be that we took the surveys in Chile after an earthquake struck and produced a tsunami, and the population of Chile is well trained and experienced in knowing what to do in case an alarm is sounded warning of an imminent inundation.

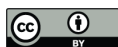

Insert Figure 7

Insert Figure 8

#### 4 Discussion

- 5 The literature indicates that social vulnerability has a large influence on how people respond to natural disasters. There is agreement that more vulnerable inhabitants not only suffer the most during a natural disaster but also are less resilient, which affects their ability to recover afterward. However, when we review the literature that deals with evacuation processes, social vulnerability, in the best cases, is acknowledged as an important factor that needs to be included but there are no systematic frameworks to do so. Therefore, it is assumed that people with different social vulnerability behave similarly in an
- 10 evacuation process.

This paper deals with this problem by proposing a methodology to integrate social vulnerability into the calculation of how people evacuate after an EWS is activated. We develop the *Response Time by Social Vulnerability Index* (ReTSVI) methodology, which is a three-step process to determine the percentage of people that would leave an area that could be potentially inundated. For doing this, we used the methods from the LIFESim model and replaced the evacuation curves to

15 reflect the differences in the time response according to social vulnerability level.

The findings from the surveys are in agreement with the theory since the time that people take to respond increases as the vulnerability moves from low to high levels. An interesting result is shown in Figure 9, where we compare the aggregate survey responses with the evacuation responses categorized by social vulnerability level, finding that people at a medium level of vulnerability respond similarly to the aggregated values. Then, people with low and high vulnerability behave almost

20 symmetrically around the average. If we extrapolate these results to areas where we just know from first responders the aggregated evacuation rate in time, we can apply the factors indicated in Figure 9 to make a first order approximation of the difference in the evacuation rate by the social vulnerability.

Insert Figure 9

- 25 It is important to keep in mind that the surveys were taken in one location where people are highly trained to deal with tsunamis, which may present limitations applying this model in other locations. Regardless, this is an important advancement in our ability to quantify a process that is normally only addressed with qualitative methodologies. Certainly, we need to collect more data to come up with more general approximations of the importance of social vulnerability in the evacuation. However, the literature available shows that previous studies have used similar sample size (Morss et al., 2011).
- 30 The results of the example of ReTSVI in Huaraz highlight the relevance of including social vulnerability in the planning process. There are distinct differences in the percentage of people evacuated in Huaraz for blocks that are close to each other,



which is only explained by SVI since their exposure to the physical hazard and the distance to escape are similar. The same is true when the alarm is delayed, the longer it takes for the authorities to warn people, the larger the influence of SVI.

## 5 Conclusion

This article proposes a methodology to incorporate social vulnerability into current methodologies to estimate the percentage

of people that evacuate an inundation hazard zone. Previous research recognizes the relevance of social vulnerability; however, it fails to connect the physical vulnerability or the characteristics of an inundation event with social vulnerability.

Consequently, we propose a three-step methodology to include social vulnerability that we call Response Time by Social Vulnerability Index (ReTSVI).

We provide an example of the application of ReTSVI where we surveyed first responders to estimate the aggregated time of response and the time of response by social vulnerability. Then we used census data to calculate the SVI and applied into the evacuation process to inundation in Huaraz was estimated in a study by Somos-Valenzuela and colleagues (2016).

The survey shows that in the first five minutes there is the larger difference in time response between social groups. In this initial period 27% of the population living in neighbourhoods with high social vulnerability evacuated, whereas 42% and 49% of people with medium and low vulnerability escape in the same period. This tendency smooths out after 15 minutes where the distances between the different groups get closer. We use the Principal Component Analysis to construct the SVI, six factors explain social vulnerability among all blocks in Huaraz (Perú) and 57% of the variance is captured by these components. Socioeconomic status, age, gender, marital status, labour sector, education level, home-ownership, population density, poverty, and quality of dwelling materials explain the differences in social vulnerability in Huaraz.

When we incorporate social vulnerability in the evacuation models, we can identify areas where people need not only more time but also how much time to evacuate. This result is even more relevant when there is less time to react. The application of ReTSVI allows for the identification of groups that need more support at the block level. This allows policy makers to allocate resources properly, particularly in countries with limited budgets or less resilience.

## Acknowledgements

We would like to acknowledge the Ministry of Environment of Peru for providing the 2007 Census of Peru. We also thank Cesar Portocarrero for inspiring us to develop new methodologies to help the ones in need. Finally, we would like to thank Luis Rios-Cerda for his help applying the survey to first responders and Lindsey Carte for all her feedbacks and English review that help us to improve this study.



## References

- Aboelata, M. and Bowles, D. S.: LIFESim: A Model for Estimating Dam Failure Life Loss, Logan, Utah., 2005.
- Adger, N.: Social Vulnerability to Climate Change and Extremes in Coastal Vietnam, *World Dev.*, 27(2), 249–269, doi:10.1016/S0305-750X(98)00136-3, 1999.
- Adger, N. and Vincent, K.: Uncertainty in adaptive capacity, *Comptes Rendus Geosci.*, 337(4), 399–410, doi:10.1016/j.crte.2004.11.004, 2005.
- Alwang, J., Siegel, P. B., Jørgensen, S. L. and Tech, V.: *Series Vulnerability : A View From Different Disciplines.*, 2001.
- Balica, S. F.: Applying the flood vulnerability index as a knowledge base for flood risk assessment, Delft University of Technology and of the Academic Board of the UNESCO-IHE Institute for Water Education., 2012.
- Basher, R.: Global early warning systems for natural hazards: systematic and people-centred., *Philos. Trans. A. Math. Phys. Eng. Sci.*, 364(1845), 2167–82, doi:10.1098/rsta.2006.1819, 2006.
- Birkmann, J.: Risk and vulnerability indicators at different scales: Applicability, usefulness and policy implications, *Environ. Hazards*, 7(1), 20–31, doi:10.1016/j.envhaz.2007.04.002, 2007.
- Bolin, B.: Race, Class, Ethnicity, and Disaster Vulnerability, in *Handbooks of Disaster Research*, pp. 113–129, Springer Science, New York, NY., 2007.
- Boruff, B., Emrich, C. and Cutter, S.: Erosion Hazard Vulnerability of US Coastal Counties, *J. Coast. Res.*, 21(5), 932–942, doi:10.2112/04-0172.1, 2005.
- Bouwer, L. M.: Have Disaster Losses Increased Due to Anthropogenic Climate Change?, *Bull. Am. Meteorol. Soc.*, 92(1), 39–46, doi:10.1175/2010BAMS3092.1, 2011.
- Boyd, E., Levitan, M. and van Heerden, I.: Further specification of the dose-response relationship for flood fatality estimation, in *US-Bangladesh workshop on innovation in windstorm/storm surge mitigation construction*. National Science Foundation and Ministry of Disaster & Relief, Government of Bangladesh. Dhaka, pp. 19–21., 2005.
- Brown, C. and Graham, W.: Assessing the threat to life from dam failure, *Water Resour Bull*, 24(6), 1303–1309, 1988.
- Carey, M.: Living and dying with glaciers: people’s historical vulnerability to avalanches and outburst floods in Peru, *Glob. Planet. Change*, 47, 122–134, 2005.
- Carey, M.: *In the Shadow of Melting Glaciers: Climate Change and Andean Society*, Oxford Univ. Press, New York, NY., 2010.
- Chakraborty, J., Tobin, G. a. and Montz, B. E.: Population Evacuation: Assessing Spatial Variability in Geophysical Risk and Social Vulnerability to Natural Hazards, *Nat. Hazards Rev.*, 6(1), 23–33, doi:10.1061/(ASCE)1527-6988(2005)6:1(23), 2005.
- Couling, M.: Tsunami risk perception and preparedness on the east coast of New Zealand during the 2009 Samoan Tsunami

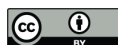

- warning, *Nat Hazards*, 71, 973–986, doi:10.1007/s11069-013-0945-y, 2014.
- Cutter, S. L.: Vulnerability to environmental hazards, *Prog. Hum. Geogr.*, 20(4), 529–539, doi:10.1177/030913259602000407, 1996.
- Cutter, S. L. and Emrich, C. T.: Moral Hazard, Social Catastrophe: The Changing Face of Vulnerability along the Hurricane  
5 Coasts, *Ann. Am. Acad. Pol. Soc. Sci.*, 604(1), 102–112, doi:10.1177/0002716205285515, 2006.
- Cutter, S. L. and Finch, C.: Temporal and spatial changes in social vulnerability to natural hazards., *Proc. Natl. Acad. Sci. U. S. A.*, 105(7), 2301–6, doi:10.1073/pnas.0710375105, 2008.
- Cutter, S. L., Mitchell, J. T. and Scott, M. S.: Revealing the Vulnerability of People and Places: A Case Study of  
Georgetown County, South Carolina, *Ann. Assoc. Am. Geogr.*, 90(4), 713–737, doi:10.1111/0004-5608.00219, 2000.
- 10 Cutter, S. L., Boruff, B. J. and Shirley, W. L.: Social Vulnerability to Environmental Hazards, *Soc. Sci. Quarterly*, 84(2), 242–161, 2003.
- DeKay, M. and McClelland, G.: Predicting loss of life in cases of dam failure and flash flood, *Risk Anal.*, 13(2), 193–205, 1993.
- Dzialek, J., Biernacki, W., Fiedeń, Ł., Listwan-Franczak, K. and Franczak, P.: Universal or context-specific social  
15 vulnerability drivers—Understanding flood preparedness in southern Poland, *Int. J. Disaster Risk Reduct.*, 19, 212–223, 2016.
- Elliott, J. and Pais, J.: Race, class, and Hurricane Katrina: Social differences in human responses to disaster, *Soc. Sci. Res.*, 35(2), 295–321, doi:10.1016/j.ssresearch.2006.02.003, 2006.
- Fekete, A.: Assessment of Social Vulnerability to River Floods in Germany., 2010.
- Fekete, A.: Spatial disaster vulnerability and risk assessments: challenges in their quality and acceptance, *Nat. Hazards*,  
20 61(3), 1161–1178, doi:10.1007/s11069-011-9973-7, 2011.
- Flanagan, B., Gregory, E., Hallisey, E., Heitgerd, J. and Lewis, B.: A social vulnerability index for disaster management, *J. Homel. Secur. Emerg. Manag.*, 8(1), 2011.
- Gaillard, J.-C. and Dibben, C. J. L.: Volcanic risk perception and beyond, *J. Volcanol. Geotherm. Res.*, 172(3–4), 163–169, doi:10.1016/j.jvolgeores.2007.12.015, 2008.
- 25 Graham, W. J.: “A procedure for estimating loss of life caused by dam failure” Rep. No. DSO-99-06, Denver, Colorado., 1999.
- Graham, W. J.: A comparison of methods for estimating loss of life from dam failure, in *Managing Our Water Retention Systems On the Cover*, 29th Annual USSD Conference, April 20–24, 2009, pp. 1143–1166, USSD-U.S. Society on Dams, Nashville, Tennessee., 2009.
- 30 Hallegatte, S.: Risk and Opportunity: Managing Risk for Development., 2014.
- Harvey, D., Kato, Y. and Passidomo, C.: Rebuilding others’ communities: a critical analysis of race and nativism in non-profits in the aftermath of Hurricane Katrina, *Local Environ.*, 21(8), 1029–1046, 2016.
- Hegglin, E. and Huggel, C.: An Integrated Assessment of Vulnerability to Glacial Hazards, *Mt. Res. Dev.*, 28(3/4), 299–309, doi:10.1659/mrd.0976, 2008.

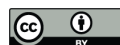

- Heinz Center: Human Links to Coastal Disasters, The H. John Heinz III Center for Science, Economics and the Environment., 2002.
- HiMAP: Quillcay Plan de Acción Local Para la Adaptacion al Cambio Climatico Subcuenca de Quillcay, Mancomunidad Municipal WARAQ, Climate Change Resilient Development Project, United States Agency for International Development, Washington DC, <http://pdf.usaid.gov>, 2014.
- 5 INE: Censo de Poblacion y Vivienda, 5, 2015.
- Ionescu, C., Klein, R. J. T., Hinkel, J., Kavi Kumar, K. . and Klein, R.: Towards a Formal Framework of Vulnerability to Climate Change. NeWater Working Paper 2 and FAVAIA Working Paper 1, Potsdam, Germany., 2005.
- ISDR: Living with risk, a global review of disaster reduction initiatives. International Strategy for Disaster Reduction initiatives, New York and Geneva., 2004.
- 10 Jonkman, S. N.: Overstromingsrisico's: een onderzoek naar de toepasbaarheid van risicomaten, 2001.
- Jonkman, S. N., Vrijling, J. K. and Vrouwenvelder, A. C. W. M.: Methods for the estimation of loss of life due to floods: A literature review and a proposal for a new method, Nat. Hazards, 46(3), 353–389, doi:10.1007/s11069-008-9227-5, 2008.
- Jonkman, S. N., Maaskant, B., Boyd, E. and Levitan, M. L.: Loss of life caused by the flooding of New Orleans after Hurricane Katrina: analysis of the relationship between flood characteristics and mortality, Risk Anal., 29(5), 676–698, 15 2009.
- Lehman, W. and Needham, J.: Consequence Estimation for Dam Failures Using HEC-FIA 2.2., 2012.
- Lindell, M. K., Lu, J.-C. and Prater, C. S.: Household decision making and evacuation in response to Hurricane Lili, Nat. Hazards Rev., 6(4), 171–179, 2005.
- 20 McClelland, D. M. and Bowles, D. S.: Estimating life loss for dam safety risk assessment--a review and new approach, Logan, Utah., 2002.
- Mileti, D. S. and O'Brien, P. W.: Warnings during disaster: Normalizing communicated risk, Nat. Hazard Rev., 39(1), 40–57, 1992.
- Morss, R. E., Wilhelmi, O. V., Meehl, G. a and Dilling, L.: Improving societal outcomes of extreme weather in a changing climate: An integrated perspective, Annu. Rev. Environ. Resour., 36, 1–25, doi:10.1146/annurev-environ-060809-100145, 25 2011.
- Nagarajan, M., Shaw, D. and Albores, P.: Disseminating a warning message to evacuate: A simulation study of the behaviour of neighbours, Eur. J. Oper. Res., 220(3), 810–819, doi:10.1016/j.ejor.2012.02.026, 2012.
- Nicholls, R. J. and Klein, R.: Assessment of Change Climate Coastal Vulnerability to, Ambio, 28(2), 182–187, 1999.
- 30 Penning-Rowsell, E., Floyd, P., Ramsbottom, D. and Surendran, S.: Estimating injury and loss of life in floods: a deterministic framework, Nat. Hazards, 36(1–2), 43–64, 2005.
- Ramsbottom, D., Wade, S., Bain, V., Hassan, M., Penning-Rowsell, E., Wilson, T., Fernandez, A., House, M. and Floyd, P.: R&D outputs: flood risks to people. Phase 2. FD2321/IR2. Department for the Environment, Food Rural Aff. Agency, 2004.
- Reiter, P.: RESCDAM–Loss of life caused by dam failure, the RESCDAM LOL method and its application to Kyrkosjarvi



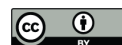

- dam in Seinajoki., 2001.
- Rivas, D. S., Somos-Valenzuela, M. A., Hodges, B. R. and McKinney, D. C.: Predicting outflow induced by moraine failure in glacial lakes: the Lake Palcacocha case from an uncertainty perspective, *Nat. Hazards Earth Syst. Sci.*, doi:10.5194/nhess-15-1163-2015, 2015.
- 5 Rodriguez, H., Quarentelli, E. and Dynes, R.: *Handbook of Disaster Research*, Springer Science, New York, NY., 2007.
- Rogers, G. O. and Sorensen, J. H.: Diffusion of Emergency Warning: Comparing Empirical and Simulation Results. In *Risk Analysis Prospects and Opportunities*, C. Zeros et al. (eds.), Plenum Press, New York, p. 117 - 134., 1991.
- Rufat, S., Tate, E., Burton, C. and Maroof, A. S.: Social vulnerability to floods: Review of case studies and implications for measurement, *Int. J. Disaster Risk Reduct.*, 14, 470–486, 2015.
- 10 Rygel, L., O’sullivan, D. and Yarnal, B.: A Method for Constructing a Social Vulnerability Index: An Application to Hurricane Storm Surges in a Developed Country, *Mitig. Adapt. Strateg. Glob. Chang.*, 11(3), 741–764, doi:10.1007/s11027-006-0265-6, 2006.
- Sadia, H., Iqbal, M., Ahmad, J., Ali, A. and Ahmad, A.: Gender-sensitive public health risks and vulnerabilities’ assessment with reference to floods in Pakistan, *Int. J. Disaster Risk Reduct.*, 19, 47–56, 2016.
- 15 Santos, G. and Aguirre, B.: *A Critical Review of Emergency Evacuation Simulation Models*, Delaware., 2004.
- Schmidtlein, M. C., Deutsch, R. C., Piegorsch, W. W. and Cutter, S. L.: A sensitivity analysis of the social vulnerability index., *Risk Anal.*, 28(4), 1099–114, doi:10.1111/j.1539-6924.2008.01072.x, 2008.
- Somos-Valenzuela, M. a., Chisolm, R. E., Rivas, D. S., Portocarrero, C. and McKinney, D. C.: Modeling a glacial lake outburst flood process chain: the case of Lake Palcacocha and Huaraz, Peru, *Hydrol. Earth Syst. Sci.*, 20(6), 2519–2543, doi:10.5194/hess-20-2519-2016, 2016.
- 20 Somos-Valenzuela, M. A.: PhD Dissertation: Vulnerability and Decision Risk Analysis in Glacier Lake Outburst Floods (GLOF). Case Studies: Quillcay Sub Basin in the Cordillera Blanca in Peru and Dudh Koshi Sub Basin in the Everest Region in Nepal, , 255, 2014.
- UN: Risk and poverty in a changing climate: Invest today for a safer tomorrow., 2009.
- 25 Urwin, K. and Jordan, A.: Does public policy support or undermine climate change adaptation? Exploring policy interplay across different scales of governance, *Glob. Environ. Chang.*, 18(1), 180–191, doi:10.1016/j.gloenvcha.2007.08.002, 2008.
- USACE: HEC-FIA Flood Impact Analysis User’s Manual, , (September), 1–352, 2012.
- Vrouwenvelder, A. and Steenhuis, C.: Tweede waterkeringen Hoeksche Waard, berekening van het aantal slachtoffers bij verschillende inundatiescenario’s, Rep. TNO, 1997.
- 30 Wegner, S. A.: Lo Que el Agua se Llevó: Consecuencias y Lecciones del Aluvión de Huaraz de 1941, Technical Note 7 of the series “Technical Notes on Climate Change”, Ministry of Environment, Lima, Peru., , 88, 2014.
- Whitehead, J. C., Edwards, B., Van Willigen, M., Maiolo, J. R., Wilson, K. and Smith, K. T.: Heading for higher ground: factors affecting real and hypothetical hurricane evacuation behavior, *Glob. Environ. Chang. Part B Environ. Hazards*, 2(4), 133–142, 2000.



Wold, S., Esbensen, K. and Geladi, P.: Principal component analysis, *Chemom. Intell. Lab. Syst.*, 2(1–3), 37–52, doi:10.1016/0169-7439(87)80084-9, 1987.

Zhou, Y., Li, N., Wu, W., Wu, J. and Shi, P.: Local spatial and temporal factors influencing population and societal vulnerability to natural disasters, *Risk Anal.*, 34(4), 614–639, doi:10.1111/risa.12193, 2014.



## List of Tables

Table 1: Summary of PCA Results

| Selected Census variables after PCA analysis to estimate Social Vulnerability Index (SVI)<br>+ more vulnerable – less vulnerable | Components |     |     |      |      |     |
|----------------------------------------------------------------------------------------------------------------------------------|------------|-----|-----|------|------|-----|
|                                                                                                                                  | 1          | 2   | 3   | 4    | 5    | 6   |
| - Household with 5 or more rooms                                                                                                 | .31        |     |     |      |      |     |
| - Population with health insurance                                                                                               | .40        |     |     |      |      |     |
| + Population with primary education                                                                                              | -.37       |     |     |      |      |     |
| - Population with college education                                                                                              | .43        |     |     |      |      |     |
| - Population with “white collar jobs”                                                                                            | .40        |     |     |      |      |     |
| + Indigenous population                                                                                                          | -.35       |     |     |      |      |     |
| + Population with disabilities                                                                                                   |            | .53 |     |      |      |     |
| + Population older than 65 years old                                                                                             |            | .53 |     |      |      |     |
| + Women                                                                                                                          |            | .44 |     |      |      |     |
| + Informal settlement                                                                                                            |            |     | .74 |      |      |     |
| + Household without electricity                                                                                                  |            |     | .41 |      |      |     |
| + Illiterate population                                                                                                          |            |     | .33 |      |      |     |
| - Independent houses                                                                                                             |            |     |     | .56  |      |     |
| + House rented                                                                                                                   |            |     |     | .53  |      |     |
| + Adult population divorced                                                                                                      |            |     |     | -.57 |      |     |
| + Jobs in the commerce sector                                                                                                    |            |     |     |      | .61  |     |
| + Jobs in the construction sector                                                                                                |            |     |     |      | -.33 |     |
| + Number of people per square kilometer                                                                                          |            |     |     |      | .52  |     |
| + Children less than 1 year old                                                                                                  |            |     |     |      |      | .59 |
| + Jobs in the manufacturing sector                                                                                               |            |     |     |      |      | .66 |
| % of variance explained by component                                                                                             | 20%        | 9%  | 8%  | 7%   | 7%   | 6%  |
| Cumulative explained variance                                                                                                    | 20%        | 29% | 37% | 44%  | 51%  | 57% |



## List of Figures

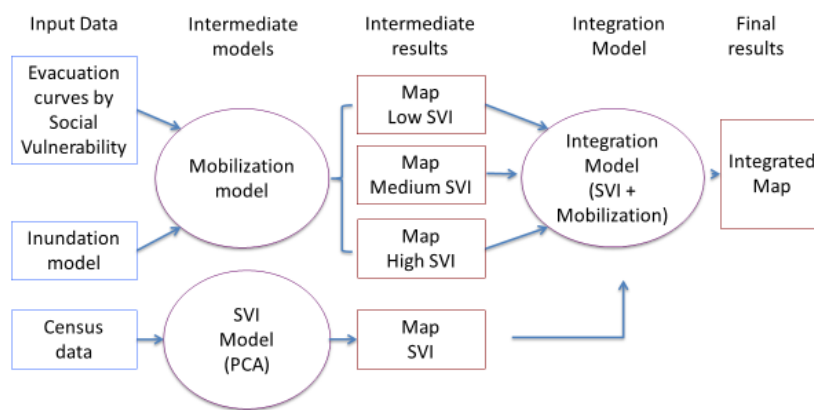

Figure 1: **ReTSVI chart**

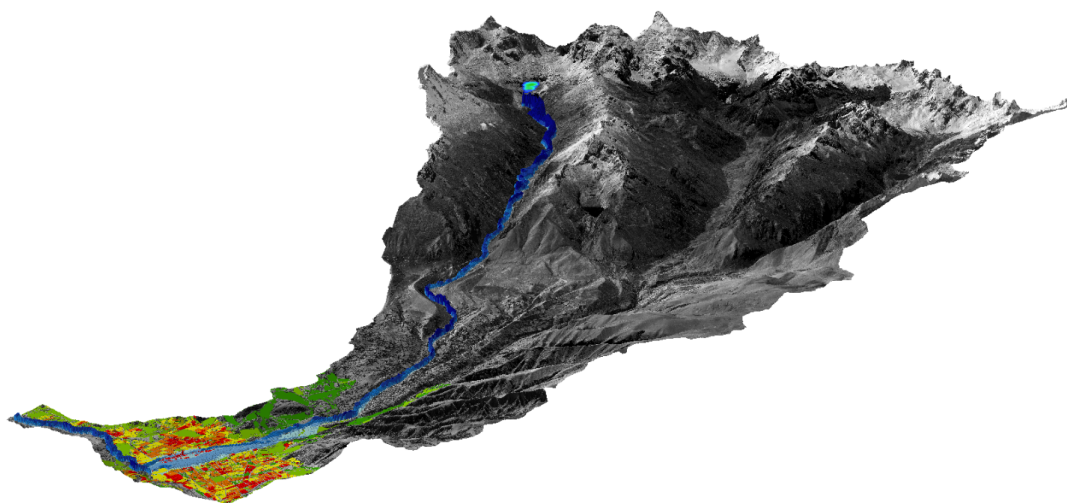

Figure 2: **Palcaz City** in Peru at the bottom of the Cojup River. Palcacocha Lake, a potential source of a GLOF, is located at the head of the river.

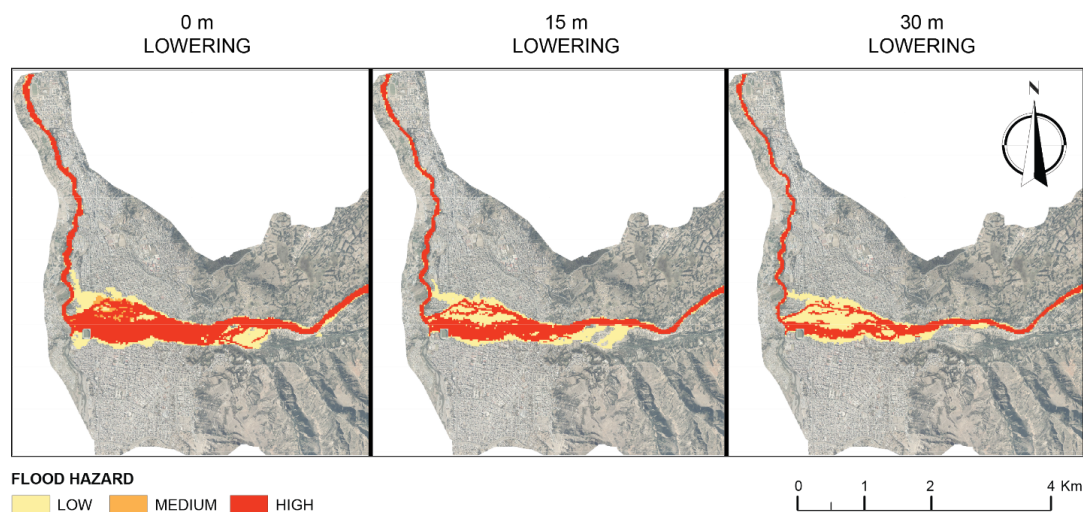

Figure 3: image corresponds to Figure 9 from (Somos-Valenzuela et al., 2016). minary hazard map of Huaraz due to a potential F originating from Lake Palcacocha with the lake at its current lev m lowering) and for the two mitigation scenarios (15 m lowering, and 30 m lowering).

5

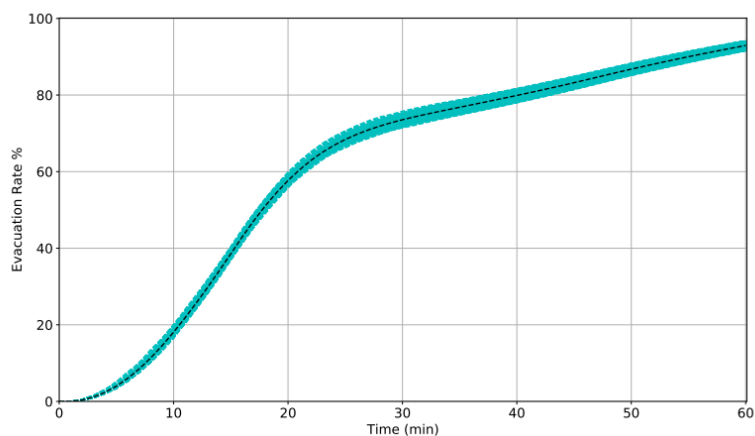

Figure 4: Evacuation rate during the first hour calculated using 1000 samples in a te Carlo Simulation

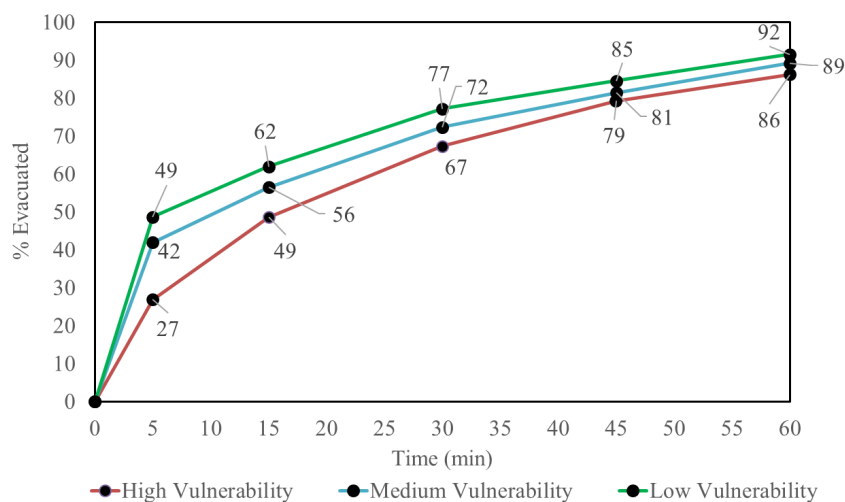

Figure 5: responder's results by social vulnerability group.

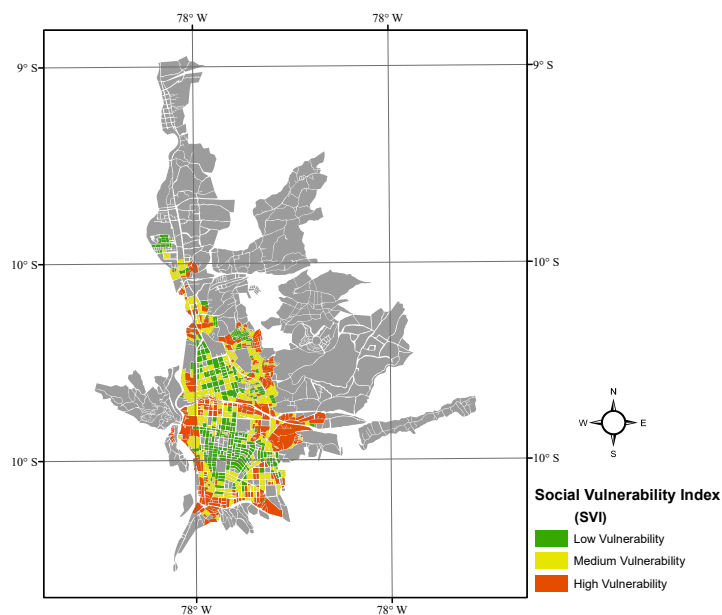

5 Figure 6: Comparative Vulnerability of Blocks in Huaraz using Social Vulnerability Index (SVI)

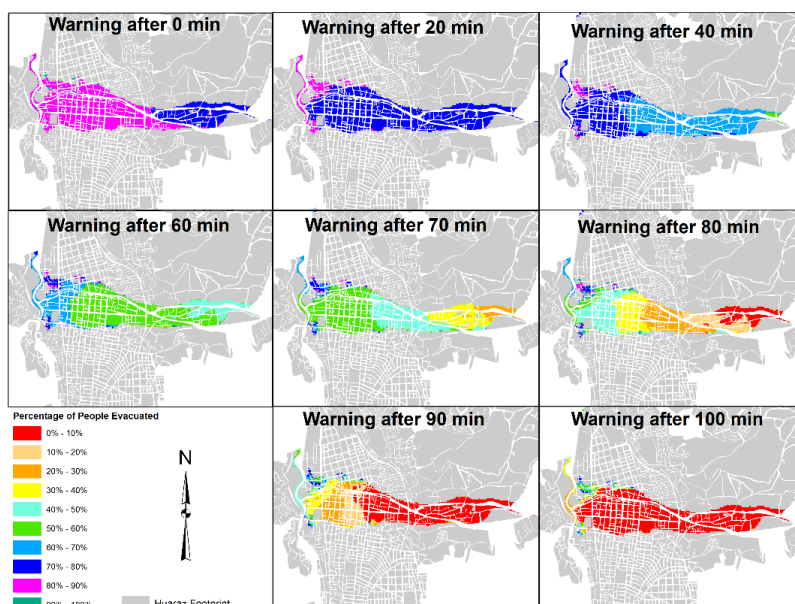

Figure 7: Evacuation using empirical equations.

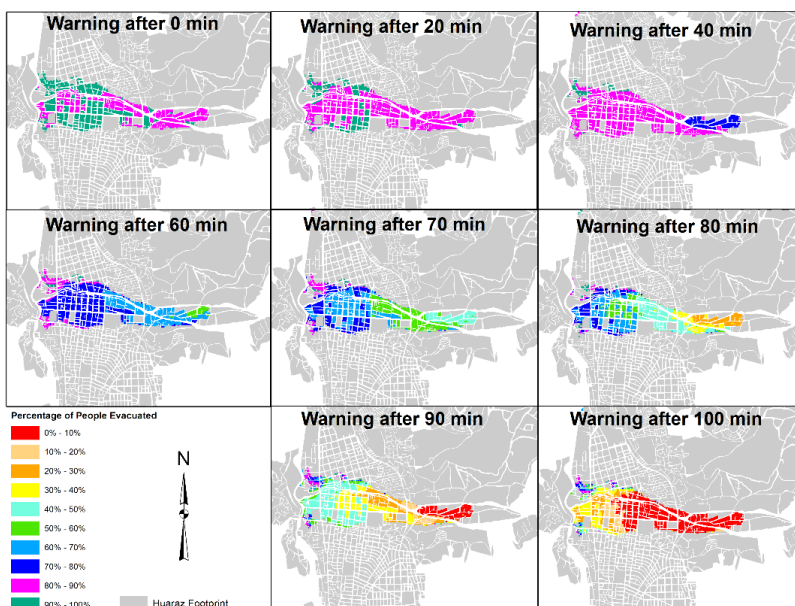

Figure 8: Evacuation using Social Vulnerability Index.

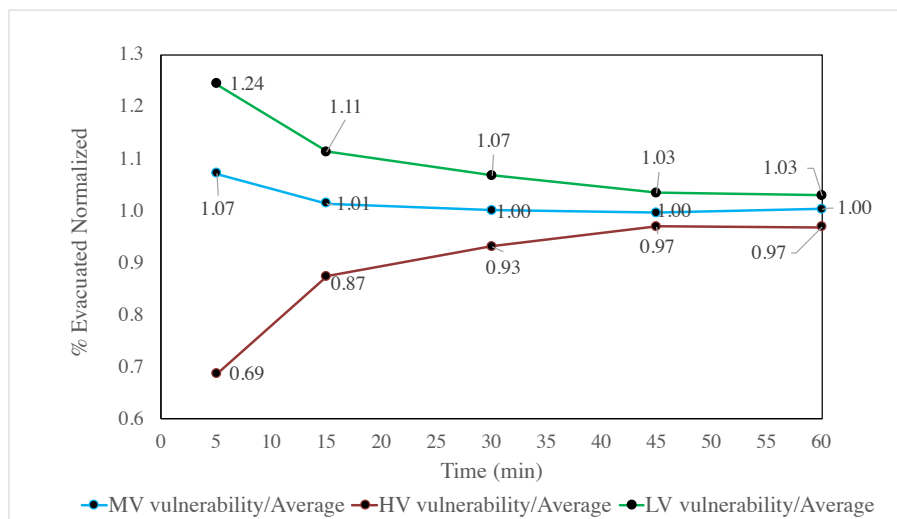

Figure 9: People evacuated per social vulnerability level normalized by the average number of people evacuated.
